# Supplementary material for: Predicting the Potentiometric Sensitivity of Membrane Sensors Based on Modified Diphenylphosphoryl Acetamide Ionophores with QSPR Modeling
Source: MDPI journal article supplement (doi:10.3390/membranes12100953), 2022-09-29
Supplement: s1 [file s1]

# Predicting potentiometric sensitivity of membrane sensors based on modified diphenylphosphoryl acetamide ionophores with QSPR modeling

Nadezhda Vladimirova <sup>1</sup>, Elena Puchkova<sup>1</sup>, Dmitry Dar'in<sup>1</sup>, Alexander Turanov<sup>2</sup>, Vasily Babain<sup>3</sup> and Dmitry Kirsanov <sup>1\*</sup>

<sup>1</sup> Institute of Chemistry, Saint-Petersburg State University, Peterhof, Universitetsky Prospekt, 26, Saint-Petersburg, 198504, Russia

<sup>2</sup> Yu. A. Ossipyan Institute of Solid-State Physics, Russian Academy of Sciences, Chernogolovka, Moscow oblast, Academician Osipyan str. 2, 142432 Russia

<sup>3</sup> independent researcher, Saint-Petersburg, Russia.

\* Correspondence: d.kirsanov@gmail.com

**Table S1.** Structures, sensitivity and literature sources of the ionophores that are collected for the database

| # | Structure of the ionophore                                                          | Sensitivity,<br>mV\dec |                  |                  | Reference |
|---|-------------------------------------------------------------------------------------|------------------------|------------------|------------------|-----------|
|   |                                                                                     | Cd <sup>2+</sup>       | Cu <sup>2+</sup> | Pb <sup>2+</sup> |           |
| 1 | 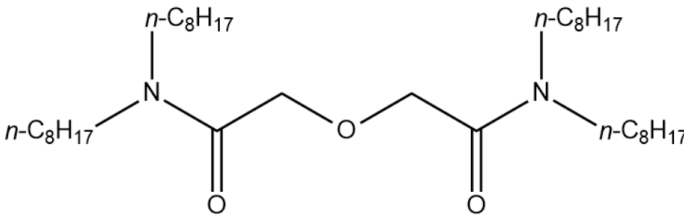 | 9                      | 5                | 30               | [S1]      |
| 2 |  | 13                     | 12               | 24               | [S1]      |
| 3 |  | 13                     | 9                | 18               | [S1]      |

|    |                                                                                     |    |    |    |      |
|----|-------------------------------------------------------------------------------------|----|----|----|------|
| 4  | 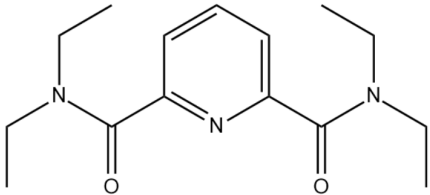   | 14 | 25 | 27 | [S1] |
| 5  |    | 14 | 23 | 26 | [S1] |
| 6  |    | 27 | 34 | 51 | [S1] |
| 7  |   | 21 | 31 | 37 | [S1] |
| 8  |  | 26 | 34 | 34 | [S1] |
| 9  |  | 32 | 43 | 44 | [S1] |
| 10 |  | 32 | 43 | 45 | [S1] |

|    |                                                                                     |    |    |    |      |
|----|-------------------------------------------------------------------------------------|----|----|----|------|
| 11 | 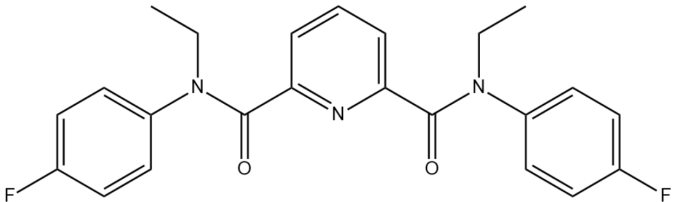   | 19 | 37 | 37 | [S1] |
| 12 |    | 23 | 28 | 28 | [S1] |
| 13 |   | 22 | 27 | 28 | [S1] |
| 14 |  | 24 | 31 | 31 | [S1] |
| 15 |  | 25 | 28 | 29 | [S1] |

|    |                                                                                     |    |    |    |      |
|----|-------------------------------------------------------------------------------------|----|----|----|------|
| 16 | 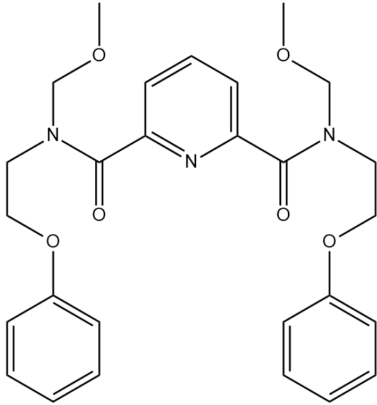   | 22 | 25 | 42 | [S1] |
| 17 |    | 36 | 31 | 24 | [S1] |
| 18 |   | 37 | 39 | 26 | [S1] |
| 19 |  | 36 | 26 | 28 | [S1] |
| 20 |  | 31 | 30 | 23 | [S1] |
| 21 |  | 36 | 34 | 23 | [S1] |

|    |                                                                                     |    |     |    |      |
|----|-------------------------------------------------------------------------------------|----|-----|----|------|
| 22 | 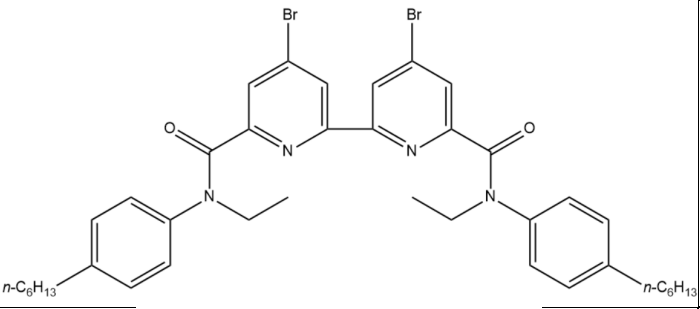  | 41 | 31  | 27 | [S1] |
| 23 |    | 3  | -12 | 0  | [S1] |
| 24 |    | 6  | 1   | 0  | [S1] |
| 25 |   | 5  | -10 | 3  | [S1] |
| 26 |  | 16 | 15  | 24 | [S1] |
| 27 |  | 15 | 15  | 24 | [S1] |
| 28 |  | 17 | 19  | 25 | [S1] |

|    |  |    |    |    |      |
|----|--|----|----|----|------|
| 29 |  | 24 | 34 | 24 | [S1] |
| 30 |  | 18 | 28 | 27 | [S1] |
| 31 |  | 18 | 20 | 28 | [S1] |
| 32 |  | 26 | 24 | 31 | [S1] |
| 33 |  | 27 | 23 | 26 | [S1] |
| 34 |  | 7  | 0  | 0  | [S1] |

|    |                                                                                     |     |    |     |      |
|----|-------------------------------------------------------------------------------------|-----|----|-----|------|
| 35 | 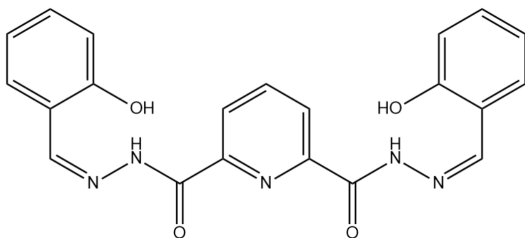   | 5   | 0  | 4   | [S1] |
| 36 |    | 18  | 9  | 9   | [S2] |
| 37 |    | -10 | 5  | -20 | [S2] |
| 38 |    | 23  | 30 | 38  | [S2] |
| 39 |   | 25  | 30 | 33  | [S2] |
| 40 |  | 27  | 26 | 40  | [S2] |
| 41 |  | 24  | 20 | 16  | [S2] |

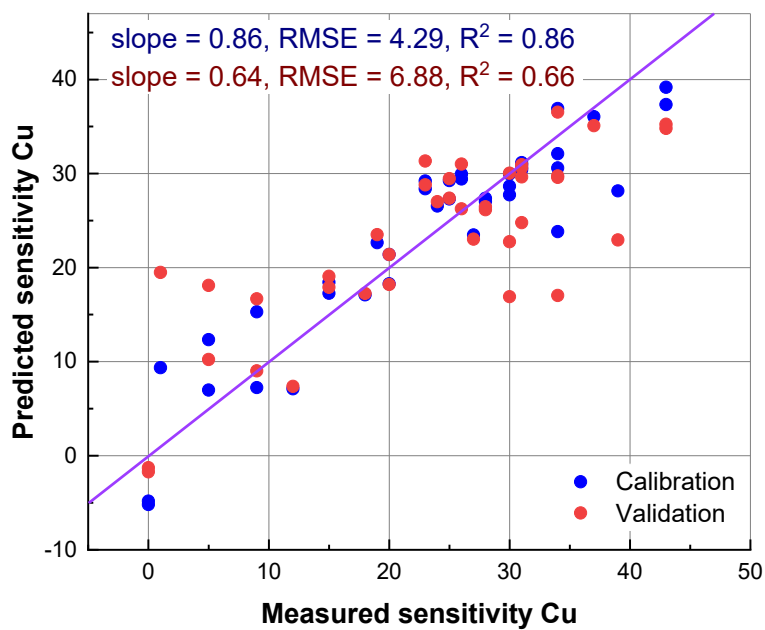

**Figure S1.** Measured vs predicted scatterplot of copper sensitivity model (two latent variables) with the plotted line of the ideal dependence.

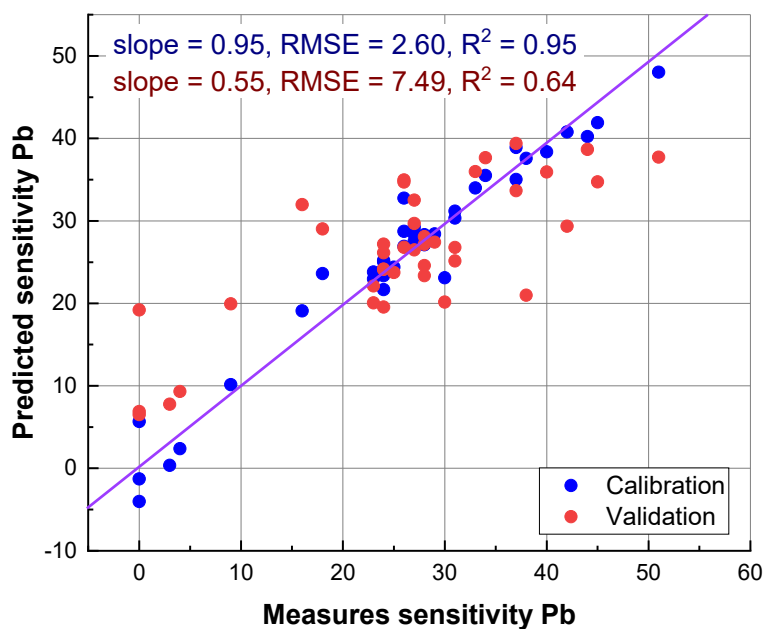

**Figure S2.** Measured vs predicted scatterplot of lead sensitivity model (six latent variables) with the plotted line of the ideal dependence.



The procedure for calculating weighted regression coefficients:

The weighted regression coefficients are calculated from the weighed data matrix with descriptors in the course of PLS regression. The detailed description can be found in ref [25]. Briefly, we decompose both X (descriptors) and Y (target sensitivity values) into latent variable space:

$$X = TP^T + E;$$

$$Y = UQ^T + F$$

Then we calculate the weighted loadings matrix:

$$W = \max(\text{cov}(T,U)),$$

and finally we calculate regression coefficients:

$$B = W(P^TW)^{-1}Q^T$$

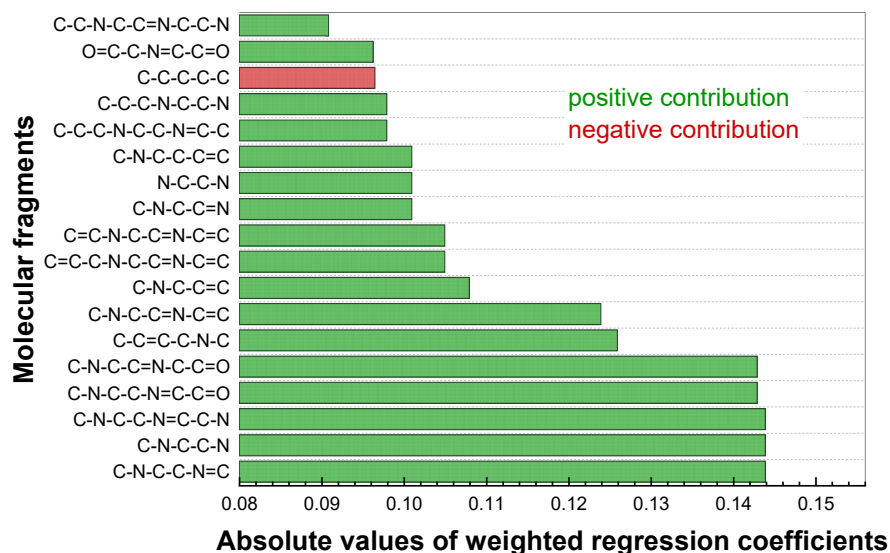

**Figure S3.** Fragments with high contributions to copper sensitivity

The fragments with the greatest positive contribution could be found in the following chemical structural piece (Fig. S4 ). Among these fragments are C-N-C-C-N=C and C-N-C-C-N, C-C=C-C-N-C and C-N-C-C=C. The fragment C-N-C-C-N=C with the greatest regression coefficient value is highlighted in the Fig. S4. This structural piece is part of compounds #17-23 in the database with high copper sensitivity.

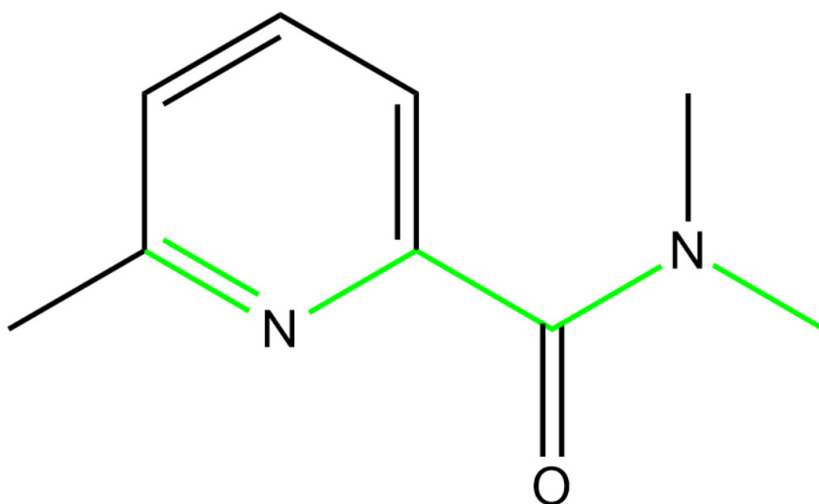

**Figure S4.** Piece of chemical structure with highlighted C-N-C-C-N=C molecular fragment.

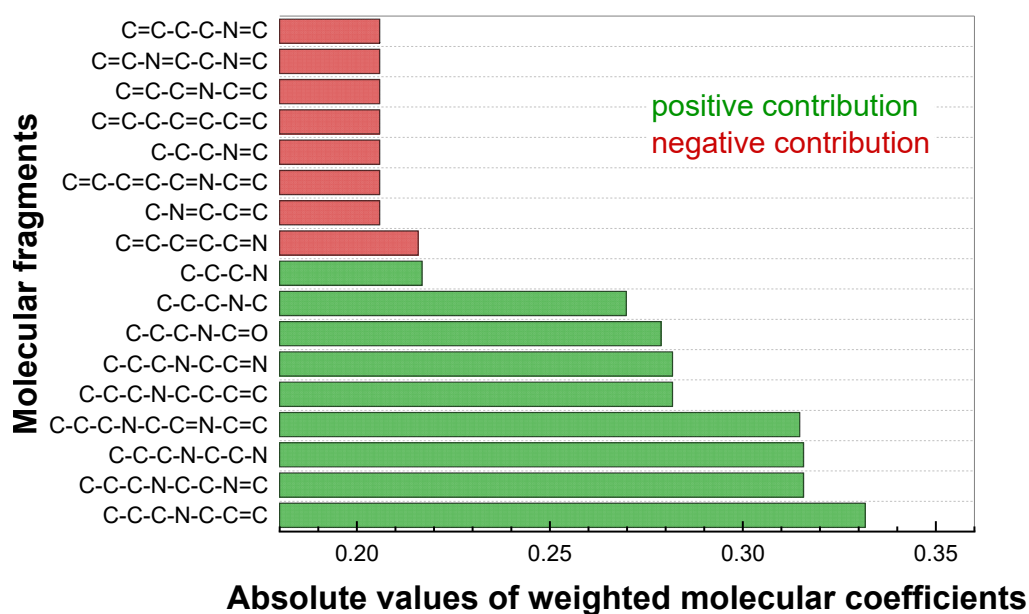

**Figure S5.** Fragments with high contributions to lead sensitivity

N2,N2,N6,N6-tetraisobutylpyridine-2,6-dicarboxamide (ionophore #6 in the Table S1) has the greatest sensitivity to lead (51 mV/dec). It has several fragments with significant positive contribution such as C-C-C-N-C-C-N=C, C-C-C-N-C-C-N, C-C-C-N-C-C=N-C=C, C-C-C-N-C-C=N and C-C-C-N-C=O and a couple of fragments (C=C-C=C-C=N, C-N=C-C=C) with significant negative contribution.

**Table S2.** Potentiometric sensitivities of the sensors towards metal cations ( $\pm 1.5$  mV/dec).

| Sensor | Co <sup>2+</sup> | Ni <sup>2+</sup> | Cu <sup>2+</sup> | Zn <sup>2+</sup> | Cd <sup>2+</sup> | Pb <sup>2+</sup> |
|--------|------------------|------------------|------------------|------------------|------------------|------------------|
| 1      | 18               | 13               | 21               | 18               | 25               | 33               |
| 2      | 20               | 16               | 18               | 15               | 22               | 32               |
| 3      | 22               | 18               | 21               | 19               | 25               | 34               |
| 4      | 18               | 16               | 23               | 20               | 23               | 35               |

### Supplementary References

- S1. Soloviev, V.; Kirsanov, D. et al. QSPR modeling of potentiometric sensitivity towards heavy metal ions for polymeric membrane sensors. *Sens. Actuators B Chem.*, **2019**, 301. doi:10.1016/j.snb.2019.126941
- S2. Kirsanov, D., Khaydukova, M., Tkachenko, L., Legin, A. and Babain, V. Potentiometric Sensor Array for Analysis of Complex Rare Earth Mixtures. *Electroanalysis*, **2012**, 24, pp. 121-130. doi: 10.1002/elan.201100439
